# Supplementary material for: The Impact of the CpxA on Regulating Polymyxin B Resistance in Salmonella Typhimurium
Source: Research Square preprint supplement (doi:10.21203/rs.3.rs-5322344/v1), 2024-11-06
Supplement: Supplementary file 1 [file d02aa357898fb8855dd81b50.xlsx]

## Sheet: Sheet1
	Table.1 Antibiotic susceptibility test of S.typhimurium and its gene deletion strains.
	Antibiotic	The diameters of the antimicrobial circle (mm)
		SL1344	SL1344∆CpxA	SL1344∆CpxA∆ArcB
	Erythromycin	11.20±0.41	10.13±1.83	13.24±0.49*
	Gentamicin	28.01±1.47	26.33±1.17	31.33±1.65
	Chloramphenicol	29.40±0.43	27.16±0.50	32.84±0.84*
	Kanamycin	26.88±0.20	25.81±1.45	28.67±0.39
	Tetracycline	23.37±1.23	23.51±0.27	25.62±0.36
	Penicillin	17.55±0.93	20.38±1.60	20.05±1.15
	Triasone sodium	27.741.30	29.26±0.97	30.67±0.65
	Amikacin	25.53±0.70	27.23±0.97*	29.40±0.64**
	Netimicin	28.81±0.16	30.07±0.68*	31.37±0.39**
	Cephalothiophene	13.77±1.89	18.43±0.95*	19.66±2.21*
	mean±SD，n=3 independent experiments
