# Supplementary material for: The Impact of the CpxA on Regulating Polymyxin B Resistance in Salmonella Typhimurium
Source: Research Square preprint supplement (doi:10.21203/rs.3.rs-5322344/v1), 2024-11-06
Supplement: Supplementary file 2 [file d7eb53a86cefb91fdc9cb333.xlsx]

## Sheet: Sheet1
	Table.2 Data quality control
	Sample name	Raw reads	Clean reads	Raw bases	Clean bases	Error rate(%)	Q20(%)	Q30(%)	GC content(%)
	A1	7751186	7389894	1.2G	1.1G	0.01	98.66	96.03	52.12
	A2	8042464	7464636	1.2G	1.1G	0.01	98.72	96.22	52.29
	A3	6517766	6186934	1.0G	0.9G	0.01	98.53	95.66	52.56
	B1	6997116	6751964	1.0G	1.0G	0.01	98.59	95.8	52.37
	B2	7761466	7397768	1.2G	1.1G	0.01	98.75	96.3	52.72
	B3	6838642	6589418	1.0G	1.0G	0.01	98.46	95.47	53.03
	A=SL1344-Pol B, B=SL1344ΔCpxA-Pol B
